# Supplementary material for: The Incidence Patterns Model to Estimate the Distribution of New HIV Infections in Sub-Saharan Africa: Development and Validation of a Mathematical Model
Source: PubMed Central journal article supplement (PMC5021265; doi:10.1371/journal.pmed.1002121), 2016-09-13
Supplement: pmed.1002121.s002.pdf [file pmed.1002121.s002.pdf]

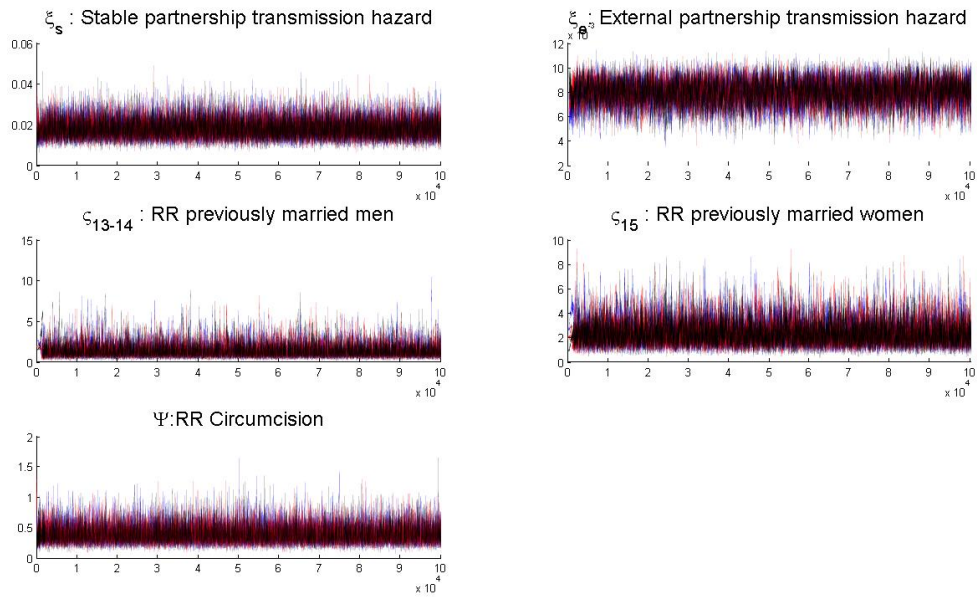

**S2 Fig. Trace plots for incidence parameters for the validation of the model on all Alpha network sites.**
