# Supplementary material for: The Incidence Patterns Model to Estimate the Distribution of New HIV Infections in Sub-Saharan Africa: Development and Validation of a Mathematical Model
Source: PubMed Central journal article supplement (PMC5021265; doi:10.1371/journal.pmed.1002121), 2016-09-13
Supplement: pmed.1002121.s006.pdf [file pmed.1002121.s006.pdf]

| Unions (C) | Risk determinants                            |
|------------|----------------------------------------------|
| 1          | Sero-discordant, man negative, circumcised   |
| 2          | Sero-discordant, man negative, uncircumcised |
| 3          | Sero-discordant, man positive                |
| 4          | Sero-concordant negative, man circumcised    |
| 5          | Sero-concordant negative, man uncircumcised  |
| 6          | Sero-concordant positive                     |
| Men (M)    |                                              |
| 1          | Married/cohabiting                           |
| 2          | Never married circumcised                    |
| 3          | Never married uncircumcised                  |
| 4          | Previously married circumcised               |
| 5          | Previously married uncircumcised             |
| 6          | Not sexually active in past 12 months        |
| Women (W)  |                                              |
| 1          | Married/cohabiting                           |
| 2          | Never married                                |
| 3          | Previously married                           |
| 4          | Not sexually active in past 12 months        |

**S1 Table. Distribution among couples, men and women according to risk determinants**

| Symbol                                | Parameter definition                                                                                                                                          | Rwanda | Gabon | Zambia | Kenya | Malawi | Swaziland | Distribution        | Sample Size               | Reference                                                                                              |
|---------------------------------------|---------------------------------------------------------------------------------------------------------------------------------------------------------------|--------|-------|--------|-------|--------|-----------|---------------------|---------------------------|--------------------------------------------------------------------------------------------------------|
| <b>Mixing Matrix</b>                  |                                                                                                                                                               |        |       |        |       |        |           |                     |                           |                                                                                                        |
| X <sub>38</sub>                       | MSM                                                                                                                                                           | 0.1    | 0.15  | 0.15   | 0.1   | 0.1    | 0.1       | Beta                | 100                       | Based on the fact that mixing among MSM is very assortative                                            |
| X <sub>39</sub>                       | MSM that are with married women                                                                                                                               | 0.3    | 0.3   | 0.3    | 0.3   | 0.3    | 0.3       | Beta                | 100                       | Based on proportion of MSM who report being married                                                    |
| X <sub>40</sub>                       | MSM that are not with married women that are with never married women                                                                                         | 0.3    | 0.3   | 0.3    | 0.2   | 0.2    | 0.3       | Beta                | 100                       | Assumption                                                                                             |
| X <sub>41</sub>                       | MSM that are not with married women that are not with never married women that are with previously married women                                              | 0.2    | 0.2   | 0.2    | 0.2   | 0.2    | 0.2       | Beta                | 100                       | Assumption                                                                                             |
| X <sub>42</sub>                       | MSM that are not with married women that are not with never married women that are not with previously married women that are with MWID                       | 0.02   | 0.02  | 0.02   | 0.02  | 0.02   | 0.02      | Beta                | 100                       | Assumption                                                                                             |
| X <sub>43</sub>                       | MSM that are not with married women that are not with never married women that are not with previously married women that are not with MWID that are with FSW | 0.9    | 0.9   | 0.9    | 0.8   | 0.8    | 0.8       | Beta                | 100                       | Assumption                                                                                             |
| X <sub>44</sub>                       | FSW that are not with never married men                                                                                                                       | 0.1    | 0.1   | 0.1    | 0.1   | 0.1    | 0.1       | Beta                | 100                       | Based on the fact that the majority of men reporting paying for sex are married men                    |
| X <sub>45</sub>                       | FSW that are not with never married men that are with married men                                                                                             | 0.9    | 0.8   | 0.9    | 0.9   | 0.9    | 0.8       | Beta                | 100                       | Assumption                                                                                             |
| X <sub>46</sub>                       | FSW that are not with never married men that are not with married men that are with previously married men                                                    | 0.95   | 0.95  | 0.95   | 0.95  | 0.95   | 0.95      | Beta                | 100                       | Assumption                                                                                             |
| X <sub>47</sub>                       | FSW that are not with never married men that are not with married men that are not with previously married men that are with MWID                             | 0.2    | 0.2   | 0.2    | 0.2   | 0.2    | 0.2       | Beta                | 100                       | Assumption                                                                                             |
| <b>Transmissibility degree among:</b> |                                                                                                                                                               |        |       |        |       |        |           | <b>Distribution</b> | <b>Standard deviation</b> |                                                                                                        |
| T <sub>1-4</sub>                      | Serodiscordant positive unions where the woman is positive                                                                                                    | 0.1    | 0.1   | 0.1    | 0.1   | 0.1    | 0.1       | Normal              | 0.02                      | Baseline                                                                                               |
| T <sub>5-8</sub>                      | serodiscordant positive unions where the man is positive                                                                                                      | 0.2    | 0.2   | 0.2    | 0.2   | 0.2    | 0.2       | Normal              | 0.04                      | 2 folds higher transmission probability compared to women                                              |
| T <sub>9</sub>                        | Seroconcordant positive unions                                                                                                                                | 0.15   | 0.15  | 0.15   | 0.15  | 0.15   | 0.15      | Normal              | 0.03                      | Average between transmissibility in serodiscordant unions where man and woman is positive respectively |
| T <sub>10-11</sub>                    | Never married men                                                                                                                                             | 0.16   | 0.16  | 0.16   | 0.16  | 0.16   | 0.16      | Normal              | 0.032                     | Higher condom use than among married men and two folds transmission probability compared to women      |
| T <sub>12</sub>                       | Never married women                                                                                                                                           | 0.08   | 0.08  | 0.08   | 0.08  | 0.08   | 0.08      | Normal              | 0.016                     | Higher condom use than among married women                                                             |
| T <sub>13-14</sub>                    | Previously married men                                                                                                                                        | 0.2    | 0.2   | 0.2    | 0.2   | 0.2    | 0.2       | Normal              | 0.04                      | Assumed to be equal to that among married men                                                          |
| T <sub>15</sub>                       | Previously married women                                                                                                                                      | 0.1    | 0.1   | 0.1    | 0.1   | 0.1    | 0.1       | Normal              | 0.02                      | Assumed to be equal to that among married women                                                        |
| T <sub>18</sub>                       | FSW                                                                                                                                                           | 0.1    | 0.1   | 0.1    | 0.1   | 0.1    | 0.1       | Normal              | 0.02                      | Assumed to be equal to that among married women (fewer sex acts/higher condom use)                     |
| T <sub>19</sub>                       | FWID                                                                                                                                                          | 0.2    | 0.2   | 0.2    | 0.2   | 0.2    | 0.2       | Normal              | 0.04                      | Assumed to be higher than among married women                                                          |
| T <sub>20</sub>                       | MSM                                                                                                                                                           | 0.3    | 0.3   | 0.3    | 0.3   | 0.3    | 0.3       | Normal              | 0.06                      | Assumed to be higher than among married men (anal sex)                                                 |
| T <sub>21</sub>                       | MWID                                                                                                                                                          | 0.2    | 0.2   | 0.2    | 0.2   | 0.2    | 0.2       | Normal              | 0.04                      | Assumed to be equal to that among married men                                                          |

Table S13 ctd. Priors for the parameters informing the transmission model

## References

1. Wringe A, Floyd S, Kazooba P, et al. Antiretroviral therapy uptake and coverage in four HIV community cohort studies in sub-Saharan Africa. *Tropical Medicine & International Health* 2012; **17**(8): e38-e48.
