# Supplementary material for: The Incidence Patterns Model to Estimate the Distribution of New HIV Infections in Sub-Saharan Africa: Development and Validation of a Mathematical Model
Source: PubMed Central journal article supplement (PMC5021265; doi:10.1371/journal.pmed.1002121), 2016-09-13
Supplement: pmed.1002121.s007.pdf [file pmed.1002121.s007.pdf]

| Sub-region   | Countries     |
|--------------|---------------|
| Western SSA  | Gabon         |
|              | Cote D'Ivoire |
|              | Mali          |
|              | Niger         |
|              | Sierra Leone  |
|              | Guinea        |
|              | Senegal       |
|              | Cameron       |
|              | Sao Tome      |
|              | Congo         |
| Central SSA  | Zambia        |
|              | Malawi        |
|              | Zimbabwe      |
| Eastern SSA  | Kenya         |
|              | Burundi       |
|              | Rwanda        |
|              | Ethiopia      |
| Southern SSA | Swaziland     |
|              | Lesoto        |

**S2 Table. Countries included in the DHS meta-analysis to obtain prior values for each sub-region of sub-Saharan Africa (SSA)**
