# Supplementary material for: The Incidence Patterns Model to Estimate the Distribution of New HIV Infections in Sub-Saharan Africa: Development and Validation of a Mathematical Model
Source: PubMed Central journal article supplement (PMC5021265; doi:10.1371/journal.pmed.1002121), 2016-09-13
Supplement: pmed.1002121.s008.pdf [file pmed.1002121.s008.pdf]

| Manicaland R3              | Sample size | Percent | Proportion HIV+ | Mean duration sexual | Seroconversions (SC) | Rescaled SC | ART coverage HIV+ |
|----------------------------|-------------|---------|-----------------|----------------------|----------------------|-------------|-------------------|
| <b>Men</b>                 |             |         |                 |                      |                      |             |                   |
| Not Sexually active        | 503         | 27.71   | 0.06            |                      | 0                    | 0.0         |                   |
| Married                    | 1040        | 57.30   | 0.18            |                      | 38                   | 54.7        |                   |
| Never married circ         | 14          | 0.77    | 0.00            | 4.2                  | 2                    | 2.9         |                   |
| Never married uncirc.      | 209         | 11.52   | 0.04            |                      | 9                    | 12.9        |                   |
| Previously married circ.   | 3           | 0.17    | 1.00            |                      | 0                    | 0.0         |                   |
| Previously married uncirc. | 46          | 2.53    | 0.28            |                      | 3                    | 4.3         |                   |
| Total                      | 1815        | 100     |                 |                      | 52                   | 74.8        | 16.3% (n=240)     |
| <b>Women</b>               |             |         |                 |                      |                      |             |                   |
| Not Sexually active        | 999         | 29.31   | 0.22            |                      | 0                    | 0.0         |                   |
| Married                    | 2139        | 62.76   | 0.14            |                      | 66                   | 50.6        |                   |
| Never married              | 59          | 1.73    | 0.27            | 8.7                  | 15                   | 11.5        |                   |
| Previously married         | 211         | 6.19    | 0.35            |                      | 35                   | 26.8        |                   |
| Total                      | 3408        | 100     |                 |                      | 116                  | 88.9        | 26.9% (n=605)     |
| <b>Unions</b>              |             |         |                 |                      |                      |             |                   |
| SC Pos.                    | 45          | 8.51    | 1               |                      | 0                    | 0.0         |                   |
| SC Neg. Man circ           | 42          | 7.92    | 0               |                      | 1                    | 4.4         |                   |
| SC Neg. Man uncirc         | 388         | 73.36   | 0               |                      | 13                   | 57.0        |                   |
| SD Man pos.                | 35          | 6.62    | 0.5             |                      | 6 (F)                | 26.3        |                   |
| SD Woman pos. Man circ     | 0           | 0.00    | 0.5             |                      | 0                    | 0.0         |                   |
| SD Woman pos. Man          | 19          | 3.59    | 0.5             |                      | 4 (M)                | 17.5        |                   |
| Total                      | 529         | 100.00  |                 |                      | 24                   | 105.2       |                   |

SC: sero-concordant; SD: sero-discordant; pos: HIV positive; circ: circumcised; uncirc: uncircumcised
