# Supplementary material for: The Incidence Patterns Model to Estimate the Distribution of New HIV Infections in Sub-Saharan Africa: Development and Validation of a Mathematical Model
Source: PubMed Central journal article supplement (PMC5021265; doi:10.1371/journal.pmed.1002121), 2016-09-13
Supplement: pmed.1002121.s009.pdf [file pmed.1002121.s009.pdf]

| Manicaland R4              | Sample size | Percent | Proportion HIV+ | Mean duration sexual activity (variance) | Sero-conversions (SC) | Rescaled SC | ART coverage HIV+ |
|----------------------------|-------------|---------|-----------------|------------------------------------------|-----------------------|-------------|-------------------|
| <b>Men</b>                 |             |         |                 |                                          |                       |             |                   |
| Not Sexually active        | 641         | 28.15   | 0.05            |                                          | 0                     | 0.0         |                   |
| Married                    | 1376        | 60.43   | 0.18            |                                          | 18                    | 26.2        |                   |
| Never married circ         | 7           | 0.31    | 0.00            | 4.5                                      | 0                     | 0.0         |                   |
| Never married uncirc.      | 191         | 8.39    | 0.05            |                                          | 4                     | 5.8         |                   |
| Previously married circ.   | 4           | 0.18    | 0.50            |                                          | 0                     | 0.0         |                   |
| Previously married uncirc. | 58          | 2.55    | 0.28            |                                          | 4                     | 5.8         |                   |
| Total                      | 2277        | 100     |                 |                                          | 26                    | 37.8        | 16.3% (n=240)     |
| <b>Women</b>               |             |         |                 |                                          |                       |             |                   |
| Not Sexually active        | 1216        | 28.67   | 0.26            |                                          | 0                     | 0.0         |                   |
| Married                    | 2843        | 67.04   | 0.14            |                                          | 34                    | 25.9        |                   |
| Never married              | 29          | 0.69    | 0.24            | 9.9                                      | 6                     | 4.6         |                   |
| Previously married         | 153         | 3.61    | 0.39            |                                          | 13                    | 9.9         |                   |
| Total                      | 4340        | 100     |                 |                                          | 53                    | 40.4        | 26.9% (n=605)     |
| <b>Unions</b>              |             |         |                 |                                          |                       |             |                   |
| SC Pos.                    | 69          | 8.85    | 1               |                                          | 0                     | 0.0         |                   |
| SC Neg. Man circ.          | 50          | 6.41    | 0               |                                          | 0                     | 0.0         |                   |
| SC Neg. Man uncirc.        | 565         | 72.44   | 0               |                                          | 7 (4M/3F)             | 28.0        |                   |
| SD Man pos.                | 63          | 8.08    | 0.5             |                                          | 2 (F)                 | 8.0         |                   |
| SD Woman pos. Man circ.    | 3           | 0.38    | 0.5             |                                          | 0                     | 0.0         |                   |
| SD Woman pos. Man uncirc.  | 30          | 3.85    | 0.5             |                                          | 4(M)                  | 16.0        |                   |
| Total                      | 780         | 100     |                 |                                          | 13                    | 52.1        |                   |

SC: sero-concordant; SD:sero-discordant; pos: HIV positive; circ: circumcised; uncirc: uncircumcised
