# Supplementary material for: The Incidence Patterns Model to Estimate the Distribution of New HIV Infections in Sub-Saharan Africa: Development and Validation of a Mathematical Model
Source: PubMed Central journal article supplement (PMC5021265; doi:10.1371/journal.pmed.1002121), 2016-09-13
Supplement: pmed.1002121.s010.pdf [file pmed.1002121.s010.pdf]

| Rakai R11                  | Sample size | Percent | Proportion HIV + | mean duration sexual activity (variance) | Sero-conversions (SC) | Rescaled SC | ART coverage HIV+ |
|----------------------------|-------------|---------|------------------|------------------------------------------|-----------------------|-------------|-------------------|
| <b>Men</b>                 |             |         |                  |                                          |                       |             |                   |
| Not sexually active        | 535         | 15%     | 0.04             |                                          | 0                     | 0.0         |                   |
| Married                    | 2,257       | 63%     | 0.11             |                                          | 24                    | 27.1        | 13% (n=70)        |
| Never married circ.        | 156         | 4%      | 0.03             | 7.0 (25)                                 | 0                     | 0.0         |                   |
| Never married uncirc.      | 456         | 13%     | 0.02             |                                          | 10                    | 11.3        |                   |
| Previously married circ.   | 58          | 2%      | 0.12             |                                          | 3                     | 3.4         |                   |
| Previously married uncirc. | 133         | 4%      | 0.26             |                                          | 1                     | 1.1         |                   |
| Total                      | 3595        | 100%    |                  |                                          | 38                    | 42.9        |                   |
| <b>Women</b>               |             |         |                  |                                          |                       |             |                   |
| Not sexually active        | 609         | 15%     | 0.21             |                                          | 0                     | 0.0         |                   |
| Married                    | 3,136       | 66%     | 0.09             |                                          | 43                    | 38.6        | 7.8% (n=52)       |
| Never married              | 414         | 9%      | 0.10             | 9.1 (50)                                 | 18                    | 16.1        |                   |
| Previously married         | 372         | 10%     | 0.30             |                                          | 21                    | 18.8        |                   |
| Total                      | 4531        | 100%    |                  |                                          |                       | 73.5        |                   |
| <b>Unions</b>              |             |         |                  |                                          |                       |             |                   |
| SC pos.                    | 114         | 6%      | 1.0              |                                          | 0                     | 0.0         |                   |
| SC neg. Man circ.          | 484         | 25%     | 0.0              |                                          | 2                     | 3.5         |                   |
| SC neg. Man uncirc.        | 1190        | 62%     | 0.0              |                                          | 22                    | 38.0        |                   |
| SD Man pos.                | 70          | 4%      | 0.5              |                                          | 9                     | 15.6        |                   |
| SD Female pos. Man circ.   | 16          | 1%      | 0.5              |                                          | 1                     | 1.7         |                   |
| SD Female pos. Man uncirc. | 31          | 2%      | 0.5              |                                          | 4                     | 6.9         |                   |
| Total                      | 1905        | 100%    |                  |                                          | 38                    | 65.7        |                   |

SC: sero-concordant; SD: sero-discordant; pos: HIV positive; circ: circumcised; uncirc: uncircumcised
