# Supplementary material for: The Incidence Patterns Model to Estimate the Distribution of New HIV Infections in Sub-Saharan Africa: Development and Validation of a Mathematical Model
Source: PubMed Central journal article supplement (PMC5021265; doi:10.1371/journal.pmed.1002121), 2016-09-13
Supplement: pmed.1002121.s011.pdf [file pmed.1002121.s011.pdf]

| Rakai R12                  | Sample size | Percent | Proportion HIV + | mean duration sexual activity (variance) | Sero-conversions (SC) | Rescaled SC | ART coverage HIV+ (n=128) |
|----------------------------|-------------|---------|------------------|------------------------------------------|-----------------------|-------------|---------------------------|
| <b>Men</b>                 |             |         |                  |                                          |                       |             |                           |
| Not sexually active        | 554         | 13%     | 0.03             |                                          | 0                     | 0.0         |                           |
| Married                    | 2,611       | 64%     | 0.10             |                                          | 41                    | 49.3        | 16.5%                     |
| Never married circ.        | 214         | 5%      | 0.03             |                                          | 0                     | 0.0         |                           |
| Never married uncirc.      | 498         | 12%     | 0.02             | 6.7 (26)                                 | 13                    | 15.6        |                           |
| Previously married circ.   | 88          | 2%      | 0.16             |                                          | 4                     | 4.8         |                           |
| Previously married uncirc. | 145         | 4%      | 0.22             |                                          | 8                     | 9.6         |                           |
| Total                      | 4110        | 100%    |                  |                                          | 66                    | 79.3        |                           |
| <b>Women</b>               |             |         |                  |                                          |                       |             |                           |
| Not sexually active        | 781         | 14%     | 0.19             |                                          | 0                     | 0.0         |                           |
| Married                    | 3,903       | 68%     | 0.09             |                                          | 53                    | 45.4        | 16.5%                     |
| Never married              | 462         | 8%      | 0.11             | 9.3 (52)                                 | 16                    | 13.7        |                           |
| Previously married         | 623         | 11%     | 0.33             |                                          | 22                    | 18.8        |                           |
| Total                      | 5769        | 100%    |                  |                                          | 91                    | 77.9        |                           |
| <b>Unions</b>              |             |         |                  |                                          |                       |             |                           |
| SC pos.                    | 122         | 6%      | 1.0              |                                          | 0                     | 0.0         |                           |
| SC neg. Man circ.          | 587         | 28%     | 0.0              |                                          | 6                     | 10.9        |                           |
| SC neg. Man uncirc.        | 1220        | 59%     | 0.0              |                                          | 25                    | 45.5        |                           |
| SD Man pos.                | 81          | 4%      | 0.5              |                                          | 9                     | 16.4        |                           |
| SD Female pos. Man circ.   | 34          | 2%      | 0.5              |                                          | 3                     | 5.5         |                           |
| SD Female pos. Man uncirc. | 32          | 2%      | 0.5              |                                          | 9                     | 16.4        |                           |
| Total                      | 2076        | 100%    |                  |                                          | 52                    | 94.7        |                           |

SC: sero-concordant; SD: sero-discordant; pos: HIV positive; circ: circumcised; uncirc: uncircumcised
