# Supplementary material for: The Incidence Patterns Model to Estimate the Distribution of New HIV Infections in Sub-Saharan Africa: Development and Validation of a Mathematical Model
Source: PubMed Central journal article supplement (PMC5021265; doi:10.1371/journal.pmed.1002121), 2016-09-13
Supplement: pmed.1002121.s012.pdf [file pmed.1002121.s012.pdf]

| Rakai R13                  | Sample size | Percent | Proportion HIV + | mean duration sexual activity (variance) | Sero-conversions (SC) | Rescaled SC | ART coverage HIV+ |
|----------------------------|-------------|---------|------------------|------------------------------------------|-----------------------|-------------|-------------------|
| <b>Men</b>                 |             |         |                  |                                          |                       |             |                   |
| Not sexually active        | 690         | 16%     | 0.03             |                                          | 0                     | 0.0         |                   |
| Married                    | 2,763       | 63%     | 0.12             |                                          | 24                    | 27.8        | 24.8% (n=86)      |
| Never married circ.        | 291         | 7%      | 0.02             | 7.0 (25)                                 | 2                     | 2.3         |                   |
| Never married uncirc.      | 406         | 9%      | 0.03             |                                          | 5                     | 5.8         |                   |
| Previously married circ.   | 104         | 2%      | 0.24             |                                          | 1                     | 1.2         |                   |
| Previously married uncirc. | 143         | 3%      | 0.24             |                                          | 9                     | 10.4        |                   |
| Total                      | 4397        | 100%    |                  |                                          | 41                    | 47.5        |                   |
| <b>Women</b>               |             |         |                  |                                          |                       |             |                   |
| Not sexually active        | 838         | 14%     | 0.20             |                                          | 0                     | 0.0         |                   |
| Married                    | 3,904       | 67%     | 0.10             |                                          | 43                    | 37.8        | 24.2%(n=78)       |
| Never married              | 433         | 7%      | 0.11             | 10.5 (61)                                | 13                    | 11.4        |                   |
| Previously married         | 617         | 11%     | 0.34             |                                          | 18                    | 15.8        |                   |
| Total                      | 5792        | 100%    |                  |                                          | 74                    | 65.1        |                   |
| <b>Unions</b>              |             |         |                  |                                          |                       |             |                   |
| SC pos.                    | 158         | 7%      | 1.0              |                                          | 0                     | 0.0         |                   |
| SC neg. Man circ.          | 760         | 34%     | 0.0              |                                          | 7                     | 11.5        |                   |
| SC neg. Man uncirc.        | 1130        | 51%     | 0.0              |                                          | 23                    | 37.7        |                   |
| SD Man pos.                | 86          | 4%      | 0.5              |                                          | 8                     | 13.1        |                   |
| SD Female pos. Man circ.   | 45          | 2%      | 0.5              |                                          | 0                     | 0.0         |                   |
| SD Female pos. Man uncirc. | 33          | 1%      | 0.5              |                                          | 2                     | 3.3         |                   |
| Total                      | 2212        | 100%    |                  |                                          | 40                    | 65.6        |                   |

SC: sero-concordant; SD:sero-discordant; pos: HIV positive; circ: circumcised; uncirc: uncircumcised
