# Supplementary material for: The Incidence Patterns Model to Estimate the Distribution of New HIV Infections in Sub-Saharan Africa: Development and Validation of a Mathematical Model
Source: PubMed Central journal article supplement (PMC5021265; doi:10.1371/journal.pmed.1002121), 2016-09-13
Supplement: pmed.1002121.s013.pdf [file pmed.1002121.s013.pdf]

| Karonga                    | Sample size | Percent | Proportion HIV + | mean duration sexual activity (variance) | Sero-conversions (SC) | Rescaled SC | ART coverage HIV+ |
|----------------------------|-------------|---------|------------------|------------------------------------------|-----------------------|-------------|-------------------|
| <b>Men</b>                 |             |         |                  |                                          |                       |             |                   |
| Not sexually active        | 394         | 19%     | 0.00             |                                          | 0                     | 0.0         |                   |
| Married                    | 1,426       | 67%     | 0.05             |                                          | 10                    | 11.7        |                   |
| Never married circ.        | 8           | 0%      | 0.00             | 3.4 (12)                                 | 0                     | 0.0         |                   |
| Never married uncirc.      | 259         | 12%     | 0.00             |                                          | 0                     | 0.0         |                   |
| Previously married circ.   | 1           | 0%      | 0.00             |                                          | 0                     | 0.0         |                   |
| Previously married uncirc. | 33          | 2%      | 0.12             |                                          | 1                     | 1.2         |                   |
| Total                      | 2121        | 100%    |                  |                                          | 11                    | 12.9        | 20% (n=308)       |
| <b>Women</b>               |             |         |                  |                                          |                       |             |                   |
| Not sexually active        | 287         | 10%     | 0.00             |                                          | 0                     | 0.0         |                   |
| Married                    | 2,362       | 83%     | 0.04             |                                          | 14                    | 12.2        |                   |
| Never married              | 48          | 2%      | 0.00             | 2 (14)                                   | 1                     | 0.9         |                   |
| Previously married         | 157         | 6%      | 0.17             |                                          | 2                     | 1.7         |                   |
| Total                      | 2854        | 100%    |                  |                                          | 17                    | 14.8        | 25% (n=529)       |
| <b>Unions</b>              |             |         |                  |                                          |                       |             |                   |
| SC pos.                    | 20          | 2%      | 1.0              |                                          | 0                     | 0.0         |                   |
| SC neg. Man circ.          | 33          | 3%      | 0.0              |                                          | 0                     | 0.0         |                   |
| SC neg. Man uncirc.        | 995         | 92%     | 0.0              |                                          | 6                     | 17.9        |                   |
| SD Man pos.                | 26          | 2%      | 0.5              |                                          | 1                     | 3.0         |                   |
| SD Female pos. Man circ.   | 0           | 0%      | 0.5              |                                          | 0                     | 0.0         |                   |
| SD Female pos. Man uncirc. | 10          | 1%      | 0.5              |                                          | 1                     | 3.0         |                   |
| Total                      | 1084        | 100%    |                  |                                          | 8                     | 23.9        |                   |

SC: sero-concordant; SD: sero-discardant; pos: HIV positive; circ: circumcised; uncirc: uncircumcised
