# Supplementary material for: The Incidence Patterns Model to Estimate the Distribution of New HIV Infections in Sub-Saharan Africa: Development and Validation of a Mathematical Model
Source: PubMed Central journal article supplement (PMC5021265; doi:10.1371/journal.pmed.1002121), 2016-09-13
Supplement: pmed.1002121.s014.pdf [file pmed.1002121.s014.pdf]

| Kisesa                     | Sample size | Percent | Proportion HIV + | mean duration sexual activity (variance) | Sero-conversions (SC) | Rescaled SC | ART coverage HIV+ (n=676) |
|----------------------------|-------------|---------|------------------|------------------------------------------|-----------------------|-------------|---------------------------|
| <b>Men</b>                 |             |         |                  |                                          |                       |             |                           |
| Not sexually active        | 398         | 31%     | 0.02             |                                          | 0                     | 0.0         |                           |
| Married                    | 672         | 53%     | 0.04             |                                          | 19                    | 25.7        |                           |
| Never married circ.        | 54          | 4%      | 0.00             | 3.7 (28)                                 | 1                     | 1.4         |                           |
| Never married uncirc.      | 129         | 10%     | 0.01             |                                          | 3                     | 4.1         |                           |
| Previously married circ.   | 8           | 1%      | 0.00             |                                          | 0                     | 0.0         |                           |
| Previously married uncirc. | 11          | 1%      | 0.09             |                                          | 1                     | 1.4         |                           |
| Total                      | 1272        | 100%    |                  |                                          | 24                    | 32.5        | 2.5%                      |
| <b>Women</b>               |             |         |                  |                                          |                       |             |                           |
| Not sexually active        | 740         | 34%     | 0.05             |                                          | 0                     | 0.0         |                           |
| Married                    | 1,227       | 56%     | 0.04             |                                          | 27                    | 21.4        |                           |
| Never married              | 119         | 5%      | 0.01             | 3.0 (10)                                 | 7                     | 5.5         |                           |
| Previously married         | 87          | 4%      | 0.07             |                                          | 16                    | 12.7        |                           |
| Total                      | 2173        | 100%    |                  |                                          | 50                    | 39.6        | 2.5%                      |
| <b>Unions</b>              |             |         |                  |                                          |                       |             |                           |
| SC pos.                    | 29          | 2%      | 1.0              |                                          |                       |             |                           |
| SC neg. Man circ.          | 308         | 26%     | 0.0              |                                          |                       |             |                           |
| SC neg. Man uncirc.        | 776         | 64%     | 0.0              |                                          |                       |             |                           |
| SD Man pos.                | 59          | 5%      | 0.5              |                                          | NA                    | NA          |                           |
| SD Female pos. Man circ.   | 10          | 1%      | 0.5              |                                          |                       |             |                           |
| SD Female pos. Man uncirc. | 26          | 2%      | 0.5              |                                          |                       |             |                           |
| Total                      | 1208        | 100%    |                  |                                          |                       |             |                           |

SC: sero-concordant; SD: sero-discordant; pos: HIV positive; circ: circumcised; uncirc: uncircumcised
