# Supplementary material for: The Incidence Patterns Model to Estimate the Distribution of New HIV Infections in Sub-Saharan Africa: Development and Validation of a Mathematical Model
Source: PubMed Central journal article supplement (PMC5021265; doi:10.1371/journal.pmed.1002121), 2016-09-13
Supplement: pmed.1002121.s015.pdf [file pmed.1002121.s015.pdf]

|              |                        | $V_m$ | $\omega_m$ | $Y_m$ | $\delta_n$ | $\delta_p$ | $V_w$ | $\omega_w$ | $Y_w$ | $\rho_{10}$ | $\rho_{11}$ | $\rho_{13}$ | $\rho_{14}$ | $\rho_{12}$ | $\rho_{15}$ | $\theta$ | $u$  | $\eta$ | $\delta_c$ | $\delta_d$ | $\delta_{10}, \delta_{11}$ | $\delta_{12}$ | $\rho_{20}$ | $T_{MSM}$ | $\rho_{18}$ | $T_{FSW}$ | $\rho_{21}$ | $T_{MWD}$ | $\rho_{19}$ | $T_{FWD}$ |
|--------------|------------------------|-------|------------|-------|------------|------------|-------|------------|-------|-------------|-------------|-------------|-------------|-------------|-------------|----------|------|--------|------------|------------|----------------------------|---------------|-------------|-----------|-------------|-----------|-------------|-----------|-------------|-----------|
| Malawi       | Northern               | 0.26  | 0.78       | 0.87  | 0.01       | 0.05       | 0.23  | 0.91       | 0.56  | 0.00        | 0.01        | 0.00        | 0.05        | 0.07        | 0.20        | 0.95     | 0.05 | 0.31   | 0.03       | 0.00       | 5.05                       | 2.70          | 0.00        | NA        | 0.58        | NA        | NA          | NA        | NA          | NA        |
|              | Central                | 0.21  | 0.77       | 0.93  | 0.16       | 0.07       | 0.23  | 0.90       | 0.55  | 0.04        | 0.03        | 0.00        | 0.04        | 0.02        | 0.24        | 0.92     | 0.08 | 0.44   | 0.08       | 0.22       | 4.29                       | 1.45          | 0.21        | NA        | 0.75        | NA        | NA          | NA        | NA          | NA        |
|              | Southern               | 0.21  | 0.73       | 0.90  | 0.37       | 0.41       | 0.20  | 0.85       | 0.50  | 0.02        | 0.03        | 0.42        | 0.42        | 0.12        | 0.43        | 0.90     | 0.10 | 0.47   | 0.41       | 0.50       | 4.17                       | 2.71          | 0.21        | NA        | 0.72        | NA        | NA          | NA        | NA          | NA        |
| Zambia       | Central                | 0.17  | 0.72       | 0.87  | 0.04       | 0.13       | 0.21  | 0.85       | 0.57  | 0.00        | 0.02        | 0.00        | 0.57        | 0.27        | 0.43        | 0.86     | 0.89 | 0.60   | 0.07       | 0.00       | 5.17                       | 3.25          | NA          | NA        | NA          | 0.03      | NA          | NA        | NA          | NA        |
|              | Copperbelt             | 0.30  | 0.66       | 0.88  | 0.14       | 0.25       | 0.27  | 0.76       | 0.56  | 0.00        | 0.07        | 0.41        | 0.46        | 0.15        | 0.49        | 0.88     | 0.87 | 0.76   | 0.14       | 0.00       | 5.33                       | 3.18          | NA          | NA        | NA          | 0.65      | 0.03        | NA        | NA          | NA        |
|              | Eastern                | 0.16  | 0.79       | 0.86  | 0.03       | 0.02       | 0.15  | 0.85       | 0.53  | 0.42        | 0.02        | 1.00        | 0.57        | 0.05        | 0.34        | 0.94     | 0.95 | 0.21   | 0.03       | 0.00       | 3.94                       | 1.72          | NA          | NA        | NA          | 0.03      | NA          | NA        | NA          | NA        |
|              | Luapula                | 0.18  | 0.81       | 0.87  | 0.08       | 0.05       | 0.20  | 0.85       | 0.55  | 0.00        | 0.09        | 1.00        | 0.19        | 0.10        | 0.31        | 0.89     | 0.92 | 0.36   | 0.11       | 0.00       | 3.75                       | 3.42          | NA          | NA        | NA          | 0.03      | NA          | NA        | NA          | NA        |
|              | Lusaka                 | 0.26  | 0.64       | 0.85  | 0.11       | 0.07       | 0.28  | 0.75       | 0.67  | 0.24        | 0.07        | 0.00        | 0.42        | 0.13        | 0.45        | 0.82     | 0.80 | 0.35   | 0.12       | 0.00       | 6.67                       | 3.83          | NA          | NA        | NA          | 0.03      | NA          | NA        | NA          | NA        |
|              | Northern               | 0.21  | 0.81       | 0.93  | 0.04       | 0.17       | 0.21  | 0.87       | 0.56  | 0.00        | 0.04        | 0.00        | 0.11        | 0.14        | 0.30        | 0.93     | 0.98 | 0.20   | 0.03       | 0.00       | 4.44                       | 2.71          | NA          | NA        | NA          | 0.03      | NA          | NA        | NA          | NA        |
|              | Northwestern           | 0.15  | 0.72       | 0.93  | 0.70       | 0.77       | 0.13  | 0.76       | 0.65  | 0.01        | 0.01        | 0.21        | 0.45        | 0.09        | 0.25        | 0.94     | 0.96 | 0.56   | 0.77       | 0.00       | 4.90                       | 3.86          | NA          | NA        | NA          | 0.03      | NA          | NA        | NA          | NA        |
|              | Southern               | 0.21  | 0.69       | 0.88  | 0.02       | 0.06       | 0.17  | 0.75       | 0.68  | 0.00        | 0.05        | 0.00        | 0.49        | 0.15        | 0.36        | 0.88     | 0.90 | 0.27   | 0.05       | 0.00       | 5.22                       | 3.62          | NA          | NA        | NA          | 0.03      | NA          | NA        | NA          | NA        |
|              | Western                | 0.12  | 0.63       | 0.88  | 0.42       | 0.31       | 0.13  | 0.61       | 0.72  | 0.05        | 0.05        | 0.28        | 0.45        | 0.19        | 0.27        | 0.84     | 0.92 | 0.35   | 0.47       | 0.00       | 6.49                       | 5.75          | NA          | NA        | NA          | 0.03      | NA          | NA        | NA          | NA        |
| Swaziland    | Hhohho                 | 0.33  | 0.55       | 0.94  | 0.08       | 0.22       | 0.26  | 0.61       | 0.89  | 0.15        | 0.20        | 0.56        | 0.81        | 0.46        | 0.66        | 0.84     | 0.16 | 0.51   | 0.11       | 0.17       | 6.61                       | 6.39          | 0.13        | NA        | 0.61        | 0.02      | NA          | NA        | NA          | NA        |
|              | Manzini                | 0.36  | 0.43       | 0.95  | 0.07       | 0.13       | 0.26  | 0.53       | 0.92  | 0.34        | 0.18        | 0.00        | 0.54        | 0.34        | 0.62        | 0.86     | 0.14 | 0.61   | 0.17       | 0.31       | 6.22                       | 6.34          | 0.13        | NA        | 0.61        | 0.02      | NA          | NA        | NA          | NA        |
|              | Shiselweni             | 0.44  | 0.38       | 0.94  | 0.08       | 0.21       | 0.29  | 0.48       | 0.91  | 0.11        | 0.13        | 0.30        | 0.70        | 0.40        | 0.58        | 0.82     | 0.18 | 0.49   | 0.12       | 0.12       | 5.87                       | 5.92          | 0.13        | NA        | 0.61        | 0.02      | NA          | NA        | NA          | NA        |
|              | Lubombo                | 0.36  | 0.53       | 0.92  | 0.06       | 0.14       | 0.22  | 0.60       | 0.88  | 0.14        | 0.18        | 0.69        | 0.62        | 0.33        | 0.46        | 0.81     | 0.19 | 0.49   | 0.10       | 0.08       | 6.10                       | 5.81          | 0.13        | NA        | 0.61        | 0.02      | NA          | NA        | NA          | NA        |
| Gabon        | Libreville-Port-Gentil | 0.10  | 0.60       | 0.98  | 0.99       | 1.00       | 0.14  | 0.64       | 0.95  | 0.01        | NA          | 0.08        | NA          | 0.03        | 0.09        | 0.92     | 0.08 | 0.85   | 1.00       | 1.00       | 7.79                       | 6.65          | NA          | NA        | 0.20        | 0.02      | NA          | NA        | NA          | NA        |
|              | Estuaire               | 0.13  | 0.59       | 0.98  | 0.99       | 1.00       | 0.14  | 0.69       | 0.97  | 0.01        | NA          | 0.00        | NA          | 0.05        | 0.18        | 0.94     | 0.06 | 0.60   | 1.00       | 0.88       | 5.86                       | 4.68          | NA          | NA        | 0.23        | 0.02      | NA          | NA        | NA          | NA        |
|              | Haut-Ogooué            | 0.16  | 0.58       | 0.99  | 1.00       | 1.00       | 0.13  | 0.60       | 0.97  | 0.01        | NA          | 0.00        | NA          | 0.03        | 0.40        | 0.92     | 0.08 | 0.77   | 0.99       | 1.00       | 6.43                       | 4.48          | NA          | NA        | NA          | NA        | NA          | NA        | NA          | NA        |
|              | Moyen-Ogooué           | 0.13  | 0.51       | 1.00  | 1.00       | NA         | 0.14  | 0.66       | 0.99  | 0.03        | NA          | NA          | NA          | 0.05        | 0.47        | 0.91     | 0.09 | 0.64   | 0.99       | 1.00       | 8.17                       | 7.61          | NA          | NA        | NA          | NA        | NA          | NA        | NA          | NA        |
|              | Ngounié                | 0.13  | 0.59       | 0.97  | 1.00       | 1.00       | 0.14  | 0.66       | 0.91  | 0.02        | NA          | 0.00        | NA          | 0.06        | 0.28        | 0.87     | 0.13 | 0.49   | 1.00       | 1.00       | 5.02                       | 4.98          | NA          | NA        | NA          | NA        | NA          | NA        | NA          | NA        |
|              | Nyanga                 | 0.16  | 0.59       | 0.99  | 1.00       | 1.00       | 0.12  | 0.72       | 0.94  | 0.01        | NA          | 0.11        | NA          | 0.04        | 0.37        | 0.95     | 0.05 | 0.67   | 1.00       | 1.00       | 6.87                       | 5.02          | NA          | NA        | NA          | NA        | NA          | NA        | NA          | NA        |
|              | Ogooué Maritime        | 0.11  | 0.71       | 0.95  | 1.00       | 1.00       | 0.13  | 0.78       | 0.97  | 0.01        | NA          | 0.10        | NA          | 0.04        | 0.00        | 0.94     | 0.06 | 0.54   | 1.00       | 1.00       | 5.34                       | 6.37          | NA          | NA        | NA          | NA        | NA          | NA        | NA          | NA        |
|              | Ogooué-Ivindo          | 0.11  | 0.63       | 0.95  | 1.00       | 1.00       | 0.09  | 0.67       | 0.93  | 0.00        | NA          | 0.14        | NA          | 0.02        | 0.00        | 0.94     | 0.06 | 0.40   | 0.99       | 1.00       | 6.30                       | 4.28          | NA          | NA        | NA          | NA        | NA          | NA        | NA          | NA        |
|              | Ogooué-Lolo            | 0.15  | 0.59       | 0.94  | 1.00       | 1.00       | 0.14  | 0.70       | 0.95  | 0.00        | NA          | 0.00        | NA          | 0.03        | 0.12        | 0.93     | 0.07 | 0.58   | 1.00       | 1.00       | 6.10                       | 5.49          | NA          | NA        | NA          | NA        | NA          | NA        | NA          | NA        |
| Woleu-Ntem   | 0.09                   | 0.71  | 0.97       | 1.00  | 1.00       | 0.09       | 0.75  | 0.92       | 0.01  | NA          | 0.47        | NA          | 0.07        | 0.21        | 0.91        | 0.09     | 0.58 | 1.00   | 1.00       | 5.42       | 7.87                       | NA            | NA          | NA        | NA          | NA        | NA          | NA        | NA          |           |
| Rwanda       | Kigali City            | 0.37  | 0.71       | 0.93  | 0.37       | 0.55       | 0.44  | 0.80       | 0.69  | 0.00        | 0.07        | 0.00        | 0.16        | 0.11        | 0.16        | 0.94     | 0.91 | 0.74   | 0.35       | 0.40       | 5.84                       | 3.89          | NA          | 0.00      | 0.56        | 0.02      | NA          | 0.00      | NA          | NA        |
|              | South                  | 0.40  | 0.86       | 0.91  | 0.09       | 0.08       | 0.42  | 0.84       | 0.55  | 0.00        | 0.00        | 1.00        | 0.28        | 0.12        | 0.11        | 0.98     | 0.99 | 0.00   | 0.05       | 0.00       | 4.20                       | 4.80          | NA          | 0.00      | 0.55        | 0.01      | NA          | 0.00      | NA          | NA        |
|              | West                   | 0.40  | 0.88       | 0.94  | 0.38       | 0.19       | 0.43  | 0.88       | 0.58  | 0.03        | 0.00        | 0.00        | 0.15        | 0.04        | 0.15        | 0.98     | 0.97 | 0.39   | 0.17       | 0.00       | 3.54                       | 3.99          | NA          | 0.00      | 0.55        | 0.01      | NA          | 0.00      | NA          | NA        |
|              | North                  | 0.38  | 0.86       | 0.91  | 0.22       | 0.00       | 0.43  | 0.88       | 0.55  | 0.00        | 0.00        | NA          | 0.00        | 0.04        | 0.11        | 0.98     | 0.98 | 0.00   | 0.03       | 0.00       | 4.16                       | 5.40          | NA          | 0.00      | 0.47        | 0.01      | NA          | 0.00      | NA          | NA        |
| East         | 0.35                   | 0.83  | 0.82       | 0.18  | 0.19       | 0.38       | 0.84  | 0.49       | 0.00  | 0.02        | 0.00        | 0.04        | 0.01        | 0.07        | 0.98        | 0.99     | 0.49 | 0.10   | 0.25       | 5.12       | 3.28                       | NA            | 0.00        | 0.33      | 0.01        | NA        | 0.00        | NA        | NA          |           |
| Kenya        | Nairobi                | 0.09  | 0.60       | 0.97  | 0.89       | 0.96       | 0.23  | 0.68       | 0.90  | 0.02        | 0.00        | 0.09        | 1.00        | 0.06        | 0.81        | 0.89     | 0.96 | 0.90   | 0.93       | 0.90       | 7.68                       | 5.65          | 0.13        | 0.01      | 0.49        | 0.03      | 0.19        | 2.50E-03  | 1.85E-01    | 5.00E-04  |
|              | Central                | 0.24  | 0.64       | 0.99  | 0.99       | 1.00       | 0.26  | 0.84       | 0.74  | 0.00        | 0.52        | 0.00        | NA          | 0.01        | 0.34        | 0.97     | 0.99 | 0.54   | 0.99       | 1.00       | 6.62                       | 6.43          | 0.15        | 0.01      | 0.46        | 0.02      | 0.19        | 2.50E-05  | 1.85E-01    | 5.00E-06  |
|              | Coast                  | 0.18  | 0.77       | 0.92  | 0.98       | 0.90       | 0.22  | 0.85       | 0.80  | 0.00        | 0.00        | 0.00        | 0.00        | 0.07        | 0.26        | 0.94     | 0.99 | 0.76   | 0.98       | 1.00       | 6.21                       | 5.56          | 0.16        | 0.01      | 0.35        | 0.02      | 0.31        | 2.50E-03  | 3.10E-01    | 5.00E-04  |
|              | Eastern                | 0.33  | 0.68       | 0.90  | 0.99       | 0.86       | 0.26  | 0.85       | 0.74  | 0.01        | 0.00        | 0.00        | 1.00        | 0.07        | 0.11        | 0.97     | 0.97 | 0.56   | 0.96       | 1.00       | 7.36                       | 4.99          | 0.15        | 0.01      | 0.46        | 0.02      | 0.19        | 2.50E-04  | 1.85E-01    | 5.00E-06  |
|              | Nyanza                 | 0.21  | 0.64       | 0.98  | 0.42       | 0.43       | 0.19  | 0.74       | 0.64  | 0.01        | 0.06        | 0.00        | 0.47        | 0.03        | 0.65        | 0.85     | 0.91 | 0.29   | 0.60       | 0.37       | 4.40                       | 2.12          | 0.15        | 0.01      | 0.54        | 0.02      | 0.19        | 2.50E-05  | 1.85E-01    | 5.00E-06  |
|              | Rift_Valley            | 0.20  | 0.72       | 0.98  | 0.88       | 0.97       | 0.27  | 0.79       | 0.85  | 0.00        | 0.15        | 0.00        | 0.00        | 0.11        | 0.81        | 0.97     | 0.98 | 0.66   | 0.96       | 0.81       | 6.76                       | 6.70          | 0.15        | 0.01      | 0.46        | 0.02      | 0.19        | 2.50E-05  | 1.85E-01    | 5.00E-06  |
|              | Western                | 0.30  | 0.64       | 0.94  | 0.95       | 0.82       | 0.32  | 0.84       | 0.77  | 0.03        | 0.06        | 0.00        | 1.00        | 0.04        | 0.46        | 0.96     | 0.97 | 0.70   | 0.93       | 1.00       | 6.63                       | 3.20          | 0.15        | 0.01      | 0.54        | 0.02      | 0.19        | 2.50E-05  | 1.85E-01    | 5.00E-06  |
| Northeastern | 0.36                   | 0.96  | 0.91       | 0.81  | 1.00       | 0.29       | 0.96  | 1.00       | 0.00  | NA          | 0.00        | NA          | NA          | 0.00        | 0.98        | 0.99     | 1.00 | 1.00   | 1.00       | 5.67       | NA                         | 0.15          | 0.01        | 0.46      | 0.02        | 0.19      | 2.50E-05    | 1.85E-01  | 5.00E-06    |           |

S10 Table. Data for Gabon, Kenya, Malawi, Rwanda, Swaziland and Zambia by province
