# Supplementary material for: The Incidence Patterns Model to Estimate the Distribution of New HIV Infections in Sub-Saharan Africa: Development and Validation of a Mathematical Model
Source: PubMed Central journal article supplement (PMC5021265; doi:10.1371/journal.pmed.1002121), 2016-09-13
Supplement: pmed.1002121.s016.pdf [file pmed.1002121.s016.pdf]

|              | Sample size            | $V_m$ | $V_w$ | $\rho_{10}$ | $\rho_{11}$ | $\rho_{13}$ | $\rho_{14}$ | $\rho_{12}$ | $\rho_{15}$ | $\theta$ | $u$  | $\eta$ | $\delta_c$ | $\delta_d$ | $\omega_m$ | $\Upsilon_m$ | $\delta_n$ | $\delta_p$ | $\omega_w$ | $\Upsilon_w$ | $\rho_{20}$ | $\tau_{MSM}$ | $\rho_{18}$ | $\tau_{FSW}$ | $\rho_{21}$ | $\tau_{MWID}$ | $\rho_{19}$ | $\tau_{FWID}$ |    |
|--------------|------------------------|-------|-------|-------------|-------------|-------------|-------------|-------------|-------------|----------|------|--------|------------|------------|------------|--------------|------------|------------|------------|--------------|-------------|--------------|-------------|--------------|-------------|---------------|-------------|---------------|----|
| Malawi       | Northern               | 1304  | 4189  | 4           | 166         | 3           | 19          | 62          | 51          | 566      | 530  | 36     | 12         | 507        | 968        | 233          | 181        | 23         | 3252       | 456          | NA          | NA           | 43          | NA           | NA          | NA            | NA          | NA            |    |
|              | Central                | 2611  | 7862  | 69          | 348         | 4           | 24          | 105         | 105         | 1293     | 1203 | 88     | 39         | 1160       | 2063       | 513          | 449        | 30         | 6113       | 825          | 201         | NA           | 64          | NA           | NA          | NA            | NA          | NA            |    |
|              | Southern               | 3284  | 10969 | 173         | 369         | 22          | 33          | 227         | 232         | 1485     | 1335 | 148    | 61         | 1185       | 2585       | 693          | 595        | 60         | 8764       | 1623         | 201         | NA           | 166         | NA           | NA          | NA            | NA          | NA            |    |
| Zambia       | Central                | 600   | 672   | 4           | 94          | 2           | 14          | 32          | 32          | 205      | 174  | 30     | 18         | 155        | 492        | 146          | 123        | 18         | 522        | 97           | NA          | NA           | NA          | 400          | NA          | NA            | NA          | NA            |    |
|              | Copperbelt             | 812   | 829   | 16          | 98          | 3           | 15          | 62          | 45          | 187      | 166  | 21     | 15         | 146        | 584        | 201          | 162        | 25         | 611        | 142          | NA          | NA           | 283         | 400          | NA          | NA            | NA          | NA            |    |
|              | Eastern                | 857   | 940   | 3           | 104         | 1           | 16          | 68          | 52          | 398      | 372  | 26     | 7          | 348        | 712        | 157          | 131        | 21         | 777        | 152          | NA          | NA           | NA          | 400          | NA          | NA            | NA          | NA            | NA |
|              | Luapula                | 560   | 704   | 5           | 62          | 1           | 9           | 45          | 35          | 236      | 211  | 25     | 9          | 188        | 457        | 93           | 77         | 11         | 556        | 97           | NA          | NA           | NA          | 400          | NA          | NA            | NA          | NA            |    |
|              | Lusaka                 | 962   | 939   | 14          | 162         | 2           | 26          | 84          | 39          | 301      | 251  | 50     | 18         | 204        | 722        | 254          | 215        | 36         | 691        | 172          | NA          | NA           | NA          | 400          | NA          | NA            | NA          | NA            | NA |
|              | Northern               | 715   | 783   | 5           | 81          | 1           | 7           | 44          | 33          | 285      | 263  | 22     | 4          | 252        | 554        | 127          | 103        | 9          | 608        | 108          | NA          | NA           | NA          | 400          | NA          | NA            | NA          | NA            | NA |
|              | Northwestern           | 630   | 685   | 81          | 42          | 6           | 3           | 68          | 39          | 207      | 192  | 15     | 9          | 181        | 531        | 170          | 150        | 11         | 590        | 172          | NA          | NA           | NA          | 400          | NA          | NA            | NA          | NA            | NA |
|              | Southern               | 774   | 822   | 1           | 140         | 1           | 19          | 106         | 48          | 271      | 235  | 36     | 11         | 210        | 607        | 197          | 168        | 23         | 682        | 191          | NA          | NA           | NA          | 400          | NA          | NA            | NA          | NA            | NA |
| Western      | 590                    | 772   | 56    | 88          | 5           | 13          | 159         | 56          | 211         | 171      | 40   | 18     | 152        | 512        | 213        | 172          | 21         | 662        | 278        | NA           | NA          | NA           | 400         | NA           | NA          | NA            | NA          | NA            |    |
| Swaziland    | Hhohho                 | 1019  | 1263  | 22          | 219         | 2           | 10          | 294         | 39          | 186      | 155  | 31     | 17         | 102        | 683        | 322          | 278        | 15         | 944        | 386          | 321         | NA           | 320         | 400          | NA          | NA            | NA          | NA            |    |
|              | Manzini                | 1186  | 1475  | 25          | 334         | 1           | 12          | 431         | 37          | 185      | 159  | 26     | 14         | 109        | 766        | 443          | 404        | 19         | 1102       | 537          | 321         | NA           | 320         | 400          | NA          | NA            | NA          | NA            |    |
|              | Shiselweni             | 838   | 1083  | 17          | 221         | 3           | 14          | 339         | 32          | 112      | 94   | 18     | 9          | 61         | 496        | 305          | 268        | 17         | 788        | 415          | 321         | NA           | 320         | 400          | NA          | NA            | NA          | NA            |    |
|              | Lubombo                | 1113  | 1166  | 17          | 258         | 3           | 20          | 296         | 42          | 176      | 141  | 35     | 19         | 91         | 771        | 368          | 321        | 23         | 908        | 381          | 321         | NA           | 320         | 400          | NA          | NA            | NA          | NA            |    |
| Gabon        | Libreville-Port-Gentil | 989   | 1557  | 302         | 2           | 5           | 0           | 239         | 15          | 329      | 304  | 25     | 21         | 299        | 896        | 400          | 326        | 5          | 1361       | 557          | NA          | NA           | 423         | 500          | NA          | NA            | NA          | NA            |    |
|              | Estuaire               | 617   | 844   | 189         | 2           | 6           | 0           | 132         | 6           | 170      | 157  | 13     | 8          | 156        | 543        | 242          | 205        | 6          | 740        | 277          | NA          | NA           | 601         | 500          | NA          | NA            | NA          | NA            |    |
|              | Haut-Ogooué            | 508   | 875   | 163         | 1           | 3           | 0           | 174         | 5           | 183      | 170  | 13     | 10         | 167        | 436        | 190          | 168        | 3          | 775        | 354          | NA          | NA           | NA          | NA           | NA          | NA            | NA          | NA            |    |
|              | Moyen-Ogooué           | 436   | 681   | 164         | 0           | 0           | 0           | 117         | 3           | 135      | 123  | 12     | 8          | 120        | 389        | 196          | 164        | 0          | 594        | 237          | NA          | NA           | NA          | NA           | NA          | NA            | NA          | NA            |    |
|              | Ngounié                | 565   | 871   | 170         | 0           | 9           | 0           | 127         | 12          | 206      | 186  | 20     | 10         | 184        | 495        | 209          | 171        | 9          | 772        | 304          | NA          | NA           | NA          | NA           | NA          | NA            | NA          | NA            |    |
|              | Nyanga                 | 455   | 672   | 135         | 0           | 3           | 0           | 94          | 6           | 149      | 142  | 7      | 4          | 141        | 392        | 153          | 137        | 3          | 608        | 191          | NA          | NA           | NA          | NA           | NA          | NA            | NA          | NA            | NA |
|              | Ogooué Maritime        | 449   | 560   | 91          | 0           | 5           | 0           | 60          | 3           | 163      | 153  | 10     | 6          | 151        | 406        | 142          | 93         | 5          | 501        | 153          | NA          | NA           | NA          | NA           | NA          | NA            | NA          | NA            | NA |
|              | Ogooué-Ivindo          | 612   | 984   | 171         | 0           | 9           | 0           | 160         | 9           | 230      | 218  | 11     | 5          | 218        | 542        | 210          | 173        | 9          | 896        | 317          | NA          | NA           | NA          | NA           | NA          | NA            | NA          | NA            | NA |
|              | Ogooué-Lolo            | 563   | 741   | 163         | 0           | 12          | 0           | 106         | 6           | 177      | 165  | 11     | 5          | 161        | 488        | 207          | 165        | 12         | 649        | 234          | NA          | NA           | NA          | NA           | NA          | NA            | NA          | NA            | NA |
| Woleu-Ntem   | 460                    | 637   | 114   | 0           | 5           | 0           | 85          | 11          | 141         | 127      | 14   | 9      | 124        | 420        | 143        | 117          | 5          | 581        | 160        | NA           | NA          | NA           | NA          | NA           | NA          | NA            | NA          | NA            |    |
| Rwanda       | Kigali City            | 932   | 1890  | 61          | 101         | 7           | 6           | 92          | 36          | 329      | 308  | 21     | 14         | 281        | 591        | 186          | 167        | 13         | 1063       | 242          | NA          | 100          | 233         | 100          | NA          | 100           | NA          | 100           |    |
|              | South                  | 1517  | 3340  | 9           | 102         | 1           | 9           | 88          | 65          | 678      | 668  | 10     | 0          | 662        | 915        | 133          | 111        | 11         | 1956       | 331          | NA          | 100          | 245         | 100          | NA          | 100           | NA          | 100           |    |
|              | West                   | 1413  | 3138  | 37          | 62          | 1           | 5           | 68          | 48          | 643      | 632  | 11     | 4          | 615        | 858        | 111          | 100        | 6          | 1804       | 237          | NA          | 100          | 251         | 100          | NA          | 100           | NA          | 100           |    |
|              | North                  | 971   | 2199  | 16          | 58          | 0           | 7           | 47          | 45          | 449      | 443  | 6      | 0          | 436        | 601        | 83           | 74         | 7          | 1262       | 163          | NA          | 100          | 260         | 100          | NA          | 100           | NA          | 100           |    |
|              | East                   | 1496  | 3104  | 25          | 112         | 5           | 24          | 71          | 79          | 709      | 693  | 16     | 8          | 683        | 970        | 175          | 137        | 29         | 1920       | 328          | NA          | 100          | 123         | 100          | NA          | 100           | NA          | 100           |    |
| Kenya        | Nairobi                | 428   | 952   | 98          | 19          | 4           | 2           | 207         | 6           | 141      | 128  | 13     | 11         | 123        | 388        | 145          | 129        | 5          | 724        | 258          | 2685        | 100          | 910         | 100          | 729.6       | 100           | 182.4       | 100           |    |
|              | Central                | 394   | 973   | 85          | 2           | 2           | 2           | 248         | 2           | 112      | 109  | 3      | 1          | 108        | 302        | 132          | 103        | 1          | 720        | 158          | 2437.5      | 100          | 1529        | 100          | 10          | 100           | 10          | 100           |    |
|              | Coast                  | 456   | 1149  | 79          | 4           | 9           | 2           | 316         | 2           | 160      | 151  | 9      | 6          | 149        | 369        | 109          | 89         | 9          | 896        | 186          | 2190        | 100          | 3143        | 100          | 110.4       | 100           | 27.6        | 100           |    |
|              | Eastern                | 457   | 1127  | 72          | 2           | 6           | 2           | 321         | 5           | 161      | 158  | 3      | 1          | 156        | 315        | 106          | 82         | 7          | 839        | 153          | 2437.5      | 100          | 1529        | 100          | 10          | 100           | 10          | 100           |    |
|              | Nyanza                 | 544   | 1318  | 50          | 71          | 3           | 2           | 380         | 6           | 215      | 181  | 34     | 13         | 158        | 431        | 143          | 129        | 4          | 1073       | 278          | 2437.5      | 100          | 534         | 100          | 10          | 100           | 10          | 100           |    |
|              | Rift_Valley            | 549   | 1278  | 98          | 20          | 4           | 2           | 326         | 3           | 207      | 196  | 11     | 6          | 192        | 447        | 150          | 129        | 4          | 955        | 218          | 2437.5      | 100          | 1529        | 100          | 10          | 100           | 10          | 100           |    |
|              | Western                | 457   | 1039  | 88          | 6           | 3           | 2           | 281         | 2           | 160      | 155  | 5      | 2          | 149        | 342        | 124          | 99         | 3          | 764        | 169          | 2437.5      | 100          | 534         | 100          | 10          | 100           | 10          | 100           |    |
| Northeastern | 230                    | 608   | 4     | 2           | 2           | 2           | 168         | 0           | 72          | 71       | 1    | 1      | 70         | 146        | 20         | 8            | 1          | 424        | 14         | 2437.5       | 100         | 1529         | 100         | 10           | 100         | 10            | 100         |               |    |

S11 Table. Sample sizes of the data for Gabon, Kenya, Malawi, Rwanda, Swaziland and Zambia by province.
