# Supplementary material for: The Incidence Patterns Model to Estimate the Distribution of New HIV Infections in Sub-Saharan Africa: Development and Validation of a Mathematical Model
Source: PubMed Central journal article supplement (PMC5021265; doi:10.1371/journal.pmed.1002121), 2016-09-13
Supplement: pmed.1002121.s017.pdf [file pmed.1002121.s017.pdf]

| <b>Recent Pop Survey w HIV</b>     | Last | Survey |
|------------------------------------|------|--------|
| Benin                              | 2009 | 2012   |
| Botswana                           |      | 2014   |
| Burkina Faso                       | 2009 | 2010   |
| Burundi                            | 2014 | 2010   |
| Cameroon                           |      | 2011   |
| Central African Republic           |      | 2010   |
| Cote d'Ivoire                      | 2009 | 2012   |
| Ethiopia                           |      | 2011   |
| Gabon                              |      | 2012   |
| Gambia                             |      | 2013   |
| Guinea                             |      | 2012   |
| Kenya                              | 2005 | 2012   |
| Malawi                             | 2008 | 2010   |
| Namibia                            |      | 2013   |
| Niger                              |      | 2012   |
| Nigeria                            | 2009 | 2011   |
| Rwanda                             |      | 2010   |
| Senegal                            | 2009 | 2011   |
| South Africa                       |      | 2012   |
| Swaziland                          | 2008 | 2011   |
| Tanzania                           |      | 2012   |
| Togo                               |      | 2013   |
| Uganda                             | 2008 | 2011   |
| Zambia                             | 2008 | 2013   |
| Zimbabwe                           | 2010 | 2012   |
| <b>Older Pop Survey with HIV</b>   | Last | Survey |
| Congo                              |      | 2009   |
| DRC                                |      | 2007   |
| Lesotho                            | 2008 | 2009   |
| Liberia                            |      | 2007   |
| Mozambique                         |      | 2009   |
| Sierra Leone                       | 2010 | 2008   |
| <b>No pop survey w HIV testing</b> | Last | Survey |
| Angola                             | 2012 | NA     |
| Chad                               |      | NA     |
| Djibouti                           |      | NA     |
| Equatorial Guinea                  |      | NA     |
| Eritrea                            | 2015 | NA     |
| Ghana                              | 2014 | NA     |
| Guinea Bissau                      |      | NA     |
| Mali                               |      | NA     |
| Somalia                            |      | NA     |
| South Sudan                        | 2013 | NA     |
| Sudan                              |      | NA     |

**S12 Table. Latest demographic health surveys implemented in Sub-Saharan African countries.**
