# Supplementary material for: The Incidence Patterns Model to Estimate the Distribution of New HIV Infections in Sub-Saharan Africa: Development and Validation of a Mathematical Model
Source: PubMed Central journal article supplement (PMC5021265; doi:10.1371/journal.pmed.1002121), 2016-09-13
Supplement: pmed.1002121.s018.pdf [file pmed.1002121.s018.pdf]

| Symbol               | Parameter definition                                                                                                       | Rwanda | Gabon  | Zambia | Kenya  | Malawi | Swaziland | Distribution | Sample Size | Reference                                                                                                             |
|----------------------|----------------------------------------------------------------------------------------------------------------------------|--------|--------|--------|--------|--------|-----------|--------------|-------------|-----------------------------------------------------------------------------------------------------------------------|
| <b>Mixing matrix</b> |                                                                                                                            |        |        |        |        |        |           |              |             |                                                                                                                       |
|                      | <b>Proportion of extramarital partnerships among:</b>                                                                      |        |        |        |        |        |           |              |             |                                                                                                                       |
| $\chi_1$             | married men                                                                                                                | 0.15   | 0.18   | 0.15   | 0.15   | 0.15   | 0.2       | Beta         | 100         | Based on proportion of married men and women reporting extra-marital sex in DHS                                       |
| $\chi_2$             | married women                                                                                                              | 0.1    | 0.1    | 0.1    | 0.1    | 0.1    | 0.1       | Beta         | 100         |                                                                                                                       |
| $\chi_3$             | men that are with married women                                                                                            | 0.5    | 0.6    | 0.8    | 0.8    | 0.8    | 0.2       | Beta         | 100         | Assumption                                                                                                            |
| $\chi_4$             | women that are with married men                                                                                            | 0.95   | 0.9    | 0.85   | 0.5    | 0.65   | 0.9       | Beta         | 100         | Assumption                                                                                                            |
| $\chi_5$             | men that are not with other married women that are with never married women                                                | 0.3    | 0.1    | 0.2    | 0.1    | 0.2    | 0.5       | Beta         | 100         | Assumption                                                                                                            |
| $\chi_6$             | women that are not with other married men that are with never married men                                                  | 0.3    | 0.2    | 0.2    | 0.8    | 0.9    | 0.3       | Beta         | 100         | Assumption                                                                                                            |
| $\chi_7$             | men that are not with other married women and that are not with never married women that are with previously married women | 0.1    | 0.2    | 0.1    | 0.1    | 0.6    | 0.2       | Beta         | 100         | Assumption                                                                                                            |
| $\chi_8$             | women that are not with other married men and that are not with never married men that are with previously married men     | 0.7    | 0.3    | 0.25   | 0.3    | 0.5    | 0.5       | Beta         | 100         | Assumption                                                                                                            |
| $\chi_9$             | men that are not with previously married women that are with FSW                                                           | 0.999  | 0.999  | 0.999  | 0.999  | 0.999  | 0.999     | Beta         | 100         | Based on proportion of married men reporting paying for sex in the DHS                                                |
| $\chi_{10}$          | women that are not with previously married men that are with MSM                                                           | 0.7    | 0.7    | 0.7    | 0.7    | 0.7    | 0.7       | Beta         | 100         | Assumption                                                                                                            |
|                      | <b>Proportion of disassortative partnerships among:</b>                                                                    |        |        |        |        |        |           |              |             |                                                                                                                       |
| $\chi_{11}$          | never married women                                                                                                        | 0.1    | 0.2    | 0.1    | 0.1    | 0.1    | 0.2       | Beta         | 100         | Based on proportion of 15-24 year old women reporting having sex with partners 10+ years older than themselves in DHS |
| $\chi_{12}$          | never married men                                                                                                          | 0.1    | 0.6    | 0.2    | 0.6    | 0.4    | 0.2       | Beta         | 100         | Assumption                                                                                                            |
| $\chi_{13}$          | never married men that are with married women                                                                              | 0.3    | 0.3    | 0.3    | 0.3    | 0.3    | 0.3       | Beta         | 100         | Assumption                                                                                                            |
| $\chi_{14}$          | never married women that are with married men                                                                              | 0.8    | 0.5    | 0.8    | 0.85   | 0.9    | 0.9       | Beta         | 100         | Assumption                                                                                                            |
| $\chi_{15}$          | never married women that are with previously married men                                                                   | 0.8    | 0.5    | 0.8    | 0.9    | 0.9    | 0.9       | Beta         | 100         | Assumption                                                                                                            |
| $\chi_{16}$          | never married men that are with previously married women                                                                   | 0.5    | 0.5    | 0.5    | 0.3    | 0.3    | 0.4       | Beta         | 100         |                                                                                                                       |
| $\chi_{17}$          | never married men that are not with previously married women that are with FSW                                             | 0.9999 | 0.9999 | 0.9999 | 0.9999 | 0.9999 | 0.9999    | Beta         | 100         | Based on proportion of men 15-24 who report paying for sex in DHS                                                     |
| $\chi_{18}$          | never married women that are not with previously married men that are with MSM                                             | 0.9    | 0.9    | 0.9    | 0.9    | 0.9    | 0.9       | Beta         | 100         | Assumption                                                                                                            |

**S13 Table. Priors for the parameters informing the transmission model**

| Symbol               | Parameter definition                                                                                                                                           | Rwanda | Gabon | Zambia | Kenya | Malawi | Swaziland | Distribution | Sample Size | Reference                                                                                    |
|----------------------|----------------------------------------------------------------------------------------------------------------------------------------------------------------|--------|-------|--------|-------|--------|-----------|--------------|-------------|----------------------------------------------------------------------------------------------|
| <b>Mixing matrix</b> |                                                                                                                                                                |        |       |        |       |        |           |              |             |                                                                                              |
| X <sub>19</sub>      | previously married women that are not with previously married men                                                                                              | 0.5    | 0.4   | 0.8    | 0.6   | 0.7    | 0.6       | Beta         | 100         | Assumption                                                                                   |
| X <sub>20</sub>      | previously married men that are not with previously married women                                                                                              | 0.9    | 0.1   | 0.3    | 0.1   | 0.1    | 0.1       | Beta         | 100         | Assumption                                                                                   |
| X <sub>21</sub>      | previously married women that are with married men                                                                                                             | 0.85   | 0.8   | 0.8    | 0.6   | 0.7    | 0.95      | Beta         | 100         | Assumption                                                                                   |
| X <sub>22</sub>      | previously married men that are with married women                                                                                                             | 0.6    | 0.6   | 0.6    | 0.7   | 0.7    | 0.6       | Beta         | 100         | Assumption                                                                                   |
| X <sub>23</sub>      | previously married men that are not with married women that are with never married women                                                                       | 0.6    | 0.6   | 0.6    | 0.6   | 0.6    | 0.6       | Beta         | 100         | Assumption                                                                                   |
| X <sub>24</sub>      | previously married women that are not with married men that are with never married                                                                             | 0.9    | 0.85  | 0.85   | 0.85  | 0.85   | 0.85      | Beta         | 100         | Assumption                                                                                   |
| X <sub>25</sub>      | previously married men that are not with never married women that are with FSW                                                                                 | 0.999  | 0.999 | 0.999  | 0.999 | 0.999  | 0.999     | Beta         | 100         | Assumption based on proportion of previously married men reporting paying for sex in the DHS |
| X <sub>26</sub>      | previously married women that are not with never married men that are with MSM                                                                                 | 0.9    | 0.9   | 0.9    | 0.9   | 0.9    | 0.9       | Beta         | 100         | Assumption                                                                                   |
| X <sub>27</sub>      | MWID                                                                                                                                                           | 0.3    | 0.3   | 0.3    | 0.1   | 0.1    | 0.2       | Beta         | 100         | Based on the fact that mixing among PWID is highly assortative                               |
| X <sub>28</sub>      | among MWID that are with FWID                                                                                                                                  | 0.7    | 0.7   | 0.7    | 0.7   | 0.7    | 0.7       | Beta         | 100         | Based on the fact that mixing among PWID is highly assortative                               |
| X <sub>29</sub>      | MWID that are not with FWID that are with married women                                                                                                        | 0.1    | 0.1   | 0.1    | 0.1   | 0.1    | 0.1       | Beta         | 100         | Assumption                                                                                   |
| X <sub>30</sub>      | MWID that are not with FWID that are not with married women that are with never married women                                                                  | 0.2    | 0.2   | 0.2    | 0.2   | 0.2    | 0.2       | Beta         | 100         | Assumption                                                                                   |
| X <sub>31</sub>      | MWID that are not with FWID that are not with married women that are not with never married women that are with previously married women                       | 0.3    | 0.3   | 0.3    | 0.3   | 0.3    | 0.3       | Beta         | 100         | Assumption                                                                                   |
| X <sub>32</sub>      | MWID that are not with FWID that are not with married women that are not with never married women that are not with previously married women that are with FSW | 0.8    | 0.8   | 0.8    | 0.8   | 0.8    | 0.8       | Beta         | 100         | Assumption                                                                                   |
| X <sub>33</sub>      | FWID                                                                                                                                                           | 0.5    | 0.5   | 0.5    | 0.8   | 0.8    | 0.7       | Beta         | 100         | Based on the fact that mixing among PWID is very assortative                                 |
| X <sub>34</sub>      | FWID that are with MWID                                                                                                                                        | 0.8    | 0.8   | 0.8    | 0.8   | 0.8    | 0.8       | Beta         | 100         | Based on the fact that mixing among PWID is very assortative                                 |
| X <sub>35</sub>      | FWID that are not with MWID that are with married men                                                                                                          | 0.2    | 0.2   | 0.2    | 0.2   | 0.2    | 0.2       | Beta         | 100         | Assumption                                                                                   |
| X <sub>36</sub>      | FWID that are not with MWID that are not with married men that are with never married men                                                                      | 0.5    | 0.5   | 0.5    | 0.5   | 0.5    | 0.5       | Beta         | 100         | Assumption                                                                                   |
| X <sub>37</sub>      | FWID that are not with MWID that are not with married men that are not with never married men that are with previously married men                             | 0.5    | 0.5   | 0.5    | 0.5   | 0.5    | 0.5       | Beta         | 100         | Assumption                                                                                   |

S13 Table ctd. Priors for the parameters informing the transmission model

| Symbol                                | Parameter definition                                                                                                                                          | Rwanda | Gabon | Zambia | Kenya | Malawi | Swaziland | Distribution        | Sample Size               | Reference                                                                                              |
|---------------------------------------|---------------------------------------------------------------------------------------------------------------------------------------------------------------|--------|-------|--------|-------|--------|-----------|---------------------|---------------------------|--------------------------------------------------------------------------------------------------------|
| <b>Mixing Matrix</b>                  |                                                                                                                                                               |        |       |        |       |        |           |                     |                           |                                                                                                        |
| X <sub>38</sub>                       | MSM                                                                                                                                                           | 0.1    | 0.15  | 0.15   | 0.1   | 0.1    | 0.1       | Beta                | 100                       | Based on the fact that mixing among MSM is very assortative                                            |
| X <sub>39</sub>                       | MSM that are with married women                                                                                                                               | 0.3    | 0.3   | 0.3    | 0.3   | 0.3    | 0.3       | Beta                | 100                       | Based on proportion of MSM who report being married                                                    |
| X <sub>40</sub>                       | MSM that are not with married women that are with never married women                                                                                         | 0.3    | 0.3   | 0.3    | 0.2   | 0.2    | 0.3       | Beta                | 100                       | Assumption                                                                                             |
| X <sub>41</sub>                       | MSM that are not with married women that are not with never married women that are with previously married women                                              | 0.2    | 0.2   | 0.2    | 0.2   | 0.2    | 0.2       | Beta                | 100                       | Assumption                                                                                             |
| X <sub>42</sub>                       | MSM that are not with married women that are not with never married women that are not with previously married women that are with MWID                       | 0.02   | 0.02  | 0.02   | 0.02  | 0.02   | 0.02      | Beta                | 100                       | Assumption                                                                                             |
| X <sub>43</sub>                       | MSM that are not with married women that are not with never married women that are not with previously married women that are not with MWID that are with FSW | 0.9    | 0.9   | 0.9    | 0.8   | 0.8    | 0.8       | Beta                | 100                       | Assumption                                                                                             |
| X <sub>44</sub>                       | FSW that are not with never married men                                                                                                                       | 0.1    | 0.1   | 0.1    | 0.1   | 0.1    | 0.1       | Beta                | 100                       | Based on the fact that the majority of men reporting paying for sex are married men                    |
| X <sub>45</sub>                       | FSW that are not with never married men that are with married men                                                                                             | 0.9    | 0.8   | 0.9    | 0.9   | 0.9    | 0.8       | Beta                | 100                       | Assumption                                                                                             |
| X <sub>46</sub>                       | FSW that are not with never married men that are not with married men that are with previously married men                                                    | 0.95   | 0.95  | 0.95   | 0.95  | 0.95   | 0.95      | Beta                | 100                       | Assumption                                                                                             |
| X <sub>47</sub>                       | FSW that are not with never married men that are not with married men that are not with previously married men that are with MWID                             | 0.2    | 0.2   | 0.2    | 0.2   | 0.2    | 0.2       | Beta                | 100                       | Assumption                                                                                             |
| <b>Transmissibility degree among:</b> |                                                                                                                                                               |        |       |        |       |        |           | <b>Distribution</b> | <b>Standard deviation</b> |                                                                                                        |
| T <sub>1-4</sub>                      | Serodiscordant positive unions where the woman is positive                                                                                                    | 0.1    | 0.1   | 0.1    | 0.1   | 0.1    | 0.1       | Normal              | 0.02                      | Baseline                                                                                               |
| T <sub>5-8</sub>                      | serodiscordant positive unions where the man is positive                                                                                                      | 0.2    | 0.2   | 0.2    | 0.2   | 0.2    | 0.2       | Normal              | 0.04                      | 2 folds higher transmission probability compared to women                                              |
| T <sub>9</sub>                        | Seroconcordant positive unions                                                                                                                                | 0.15   | 0.15  | 0.15   | 0.15  | 0.15   | 0.15      | Normal              | 0.03                      | Average between transmissibility in serodiscordant unions where man and woman is positive respectively |
| T <sub>10-11</sub>                    | Never married men                                                                                                                                             | 0.16   | 0.16  | 0.16   | 0.16  | 0.16   | 0.16      | Normal              | 0.032                     | Higher condom use than among married men and two folds transmission probability compared to women      |
| T <sub>12</sub>                       | Never married women                                                                                                                                           | 0.08   | 0.08  | 0.08   | 0.08  | 0.08   | 0.08      | Normal              | 0.016                     | Higher condom use than among married women                                                             |
| T <sub>13-14</sub>                    | Previously married men                                                                                                                                        | 0.2    | 0.2   | 0.2    | 0.2   | 0.2    | 0.2       | Normal              | 0.04                      | Assumed to be equal to that among married men                                                          |
| T <sub>15</sub>                       | Previously married women                                                                                                                                      | 0.1    | 0.1   | 0.1    | 0.1   | 0.1    | 0.1       | Normal              | 0.02                      | Assumed to be equal to that among married women                                                        |
| T <sub>18</sub>                       | FSW                                                                                                                                                           | 0.1    | 0.1   | 0.1    | 0.1   | 0.1    | 0.1       | Normal              | 0.02                      | Assumed to be equal to that among married women (fewer sex acts/higher condom use)                     |
| T <sub>19</sub>                       | FWID                                                                                                                                                          | 0.2    | 0.2   | 0.2    | 0.2   | 0.2    | 0.2       | Normal              | 0.04                      | Assumed to be higher than among married women                                                          |
| T <sub>20</sub>                       | MSM                                                                                                                                                           | 0.3    | 0.3   | 0.3    | 0.3   | 0.3    | 0.3       | Normal              | 0.06                      | Assumed to be higher than among married men (anal sex)                                                 |
| T <sub>21</sub>                       | MWID                                                                                                                                                          | 0.2    | 0.2   | 0.2    | 0.2   | 0.2    | 0.2       | Normal              | 0.04                      | Assumed to be equal to that among married men                                                          |

S13 Table ctd. Priors for the parameters informing the transmission model
